# Supplementary material for: Modular, inducible, and titratable expression systems for Escherichia coli and Acinetobacter baumannii
Source: PubMed Central journal article supplement (PMC11536989; doi:10.1128/spectrum.01306-24), 2024-09-20
Supplement: spectrum.01306-24-s0001.pdf [file spectrum.01306-24-s0001.pdf]

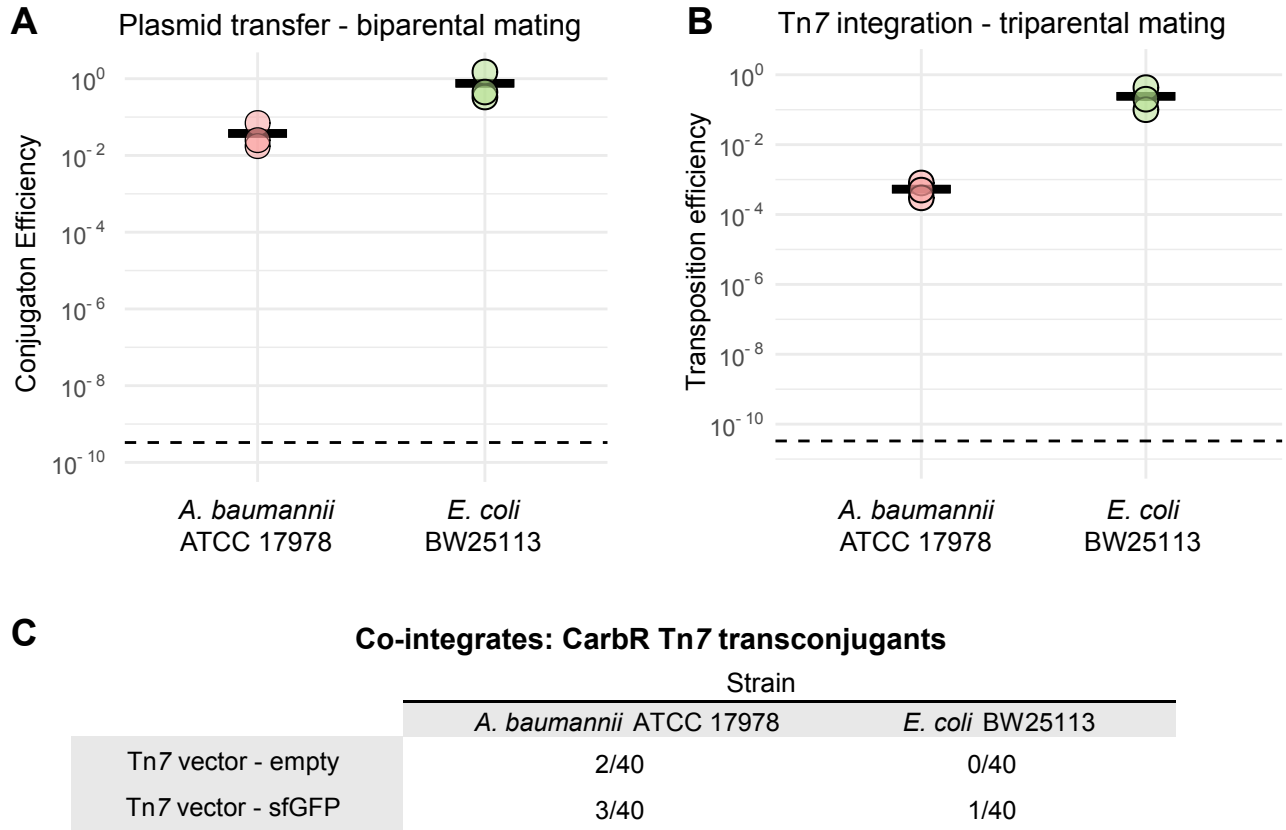

**Figure S1. Conjugation and transposition efficiencies.**

**(A)** Dot plot of conjugation efficiency of the replicative vector to the recipient strain (*A. baumannii* ATCC 17978 or *E. coli* BW25113) after ~3-hour incubations. Bars represent mean efficiencies (n=3). Dashed line is drawn at the limit of detection, defined by the maximum number of colony-forming units (CFUs) observed on non-selective plates in each experiment.

**(B)** Dot plot showing transposition efficiency of the Tn7 transposon into the att<sub>Tn7</sub> site of *A. baumannii* ATCC 17978 or *E. coli* BW25113 after ~4-hour incubation with donor strains, one carrying the Tn7 transposon vector and another carrying the Tn7 transposase vector. Bars represent mean efficiencies (n=3); dashed line shows limit of detection.

**(C)** Table showing instances of carbenicillin-resistant (CarbR) transconjugants of 40 isolates tested for Tn7 co-integrates in *A. baumannii* and *E. coli*.

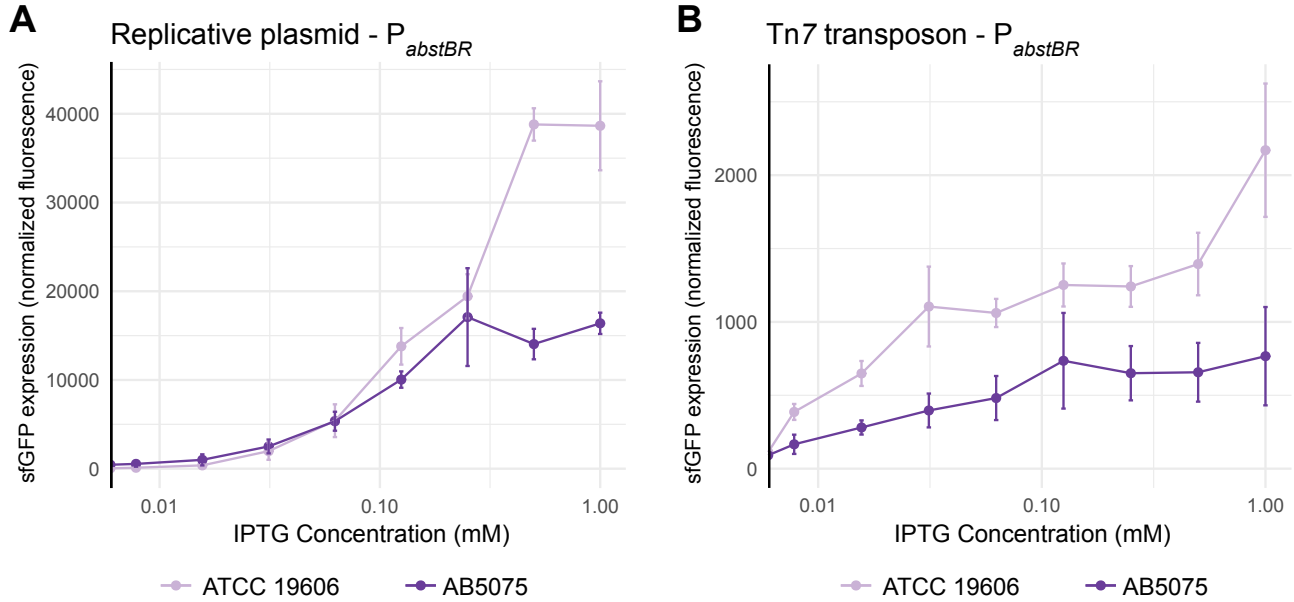

**Figure S2. Titration of  $P_{abstBR}$  expression in *A. baumannii* strains.**

Expression from **(A)** the replicative plasmid vector or **(B)** the Tn7 transposon. Plots shown are normalized sfGFP levels expressed from  $P_{abstBR}$  across IPTG concentrations for *A. baumannii* ATCC 19606 and *A. baumannii* AB5075. Error bars represent standard deviation (n=3 biological replicates for replicative vector, n=6 biological replicates for Tn7 transposon).

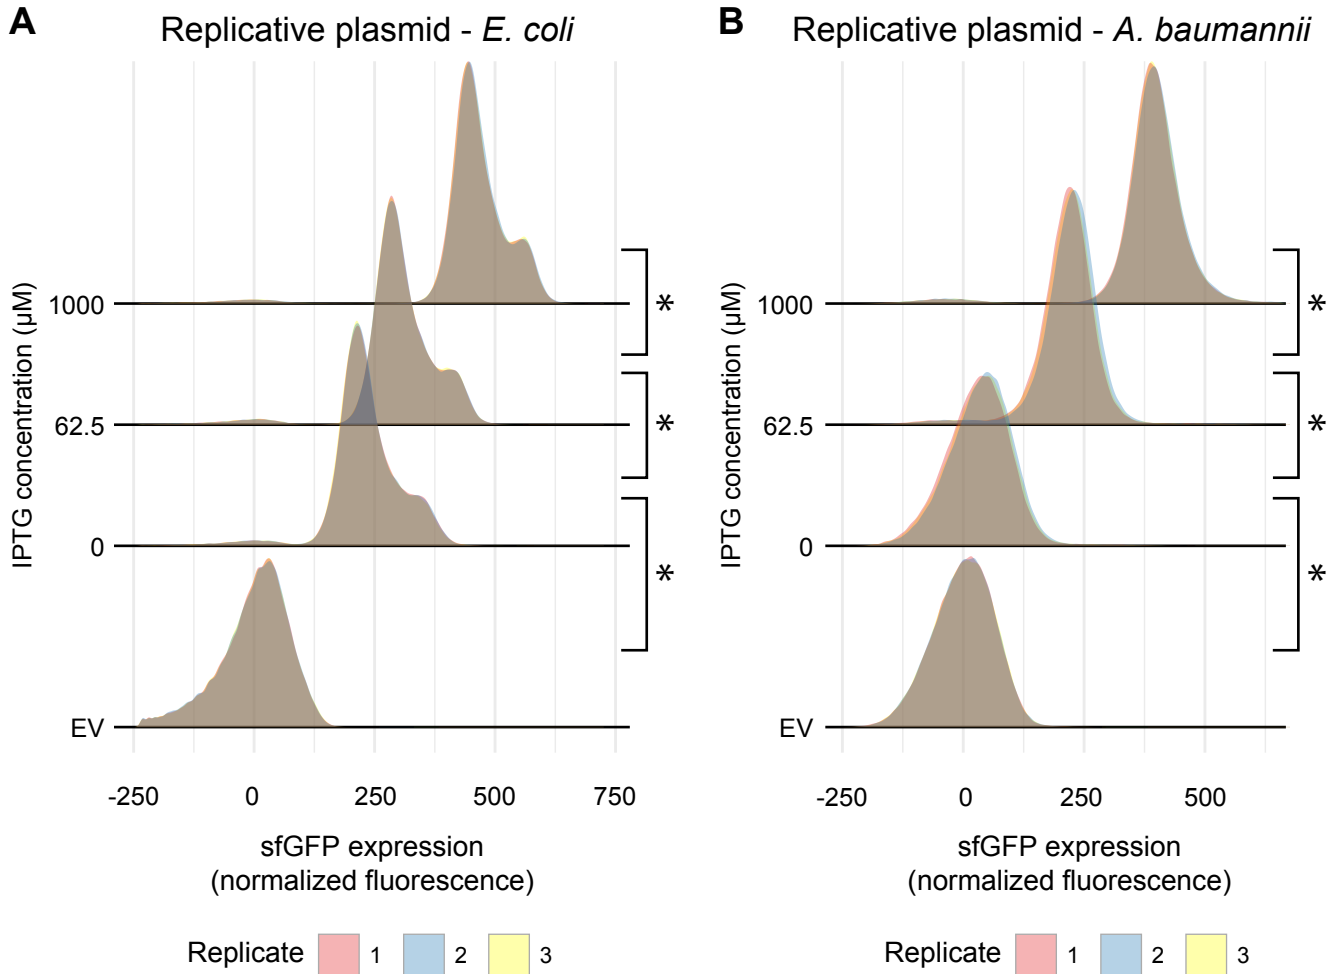

**Figure S3. Titration of  $P_{abstBR}$  expression at the single-cell level across replicates.**

Titration of sfGFP expression from the replicative expression vector, under control of  $P_{abstBR}$ , in **(A)** *E. coli* BW25113 or **(B)** *A. baumannii* ATCC 17978 at mid-log growth phase. Ridgeline plots depict density plots of sfGFP fluorescence for cells induced at 0, 62.5, or 1000  $\mu\text{M}$  IPTG, measured by flow cytometry (~95,000 cells per sample). EV are empty vector (no GFP) control samples in 1 mM IPTG. 3 biological replicates for each sample are overlaid. Asterisks indicate significant differences between samples (Welch's *t*-tests; *p*-values < 0.05 for all replicates).

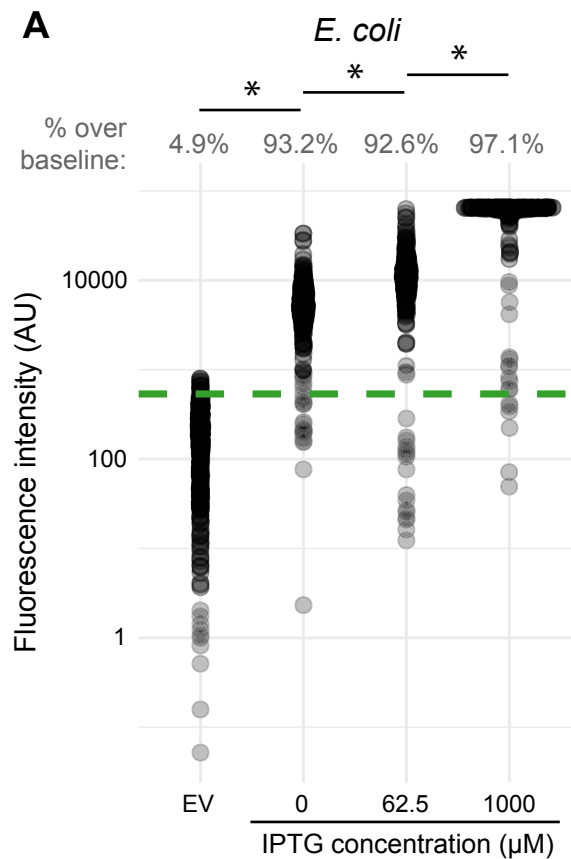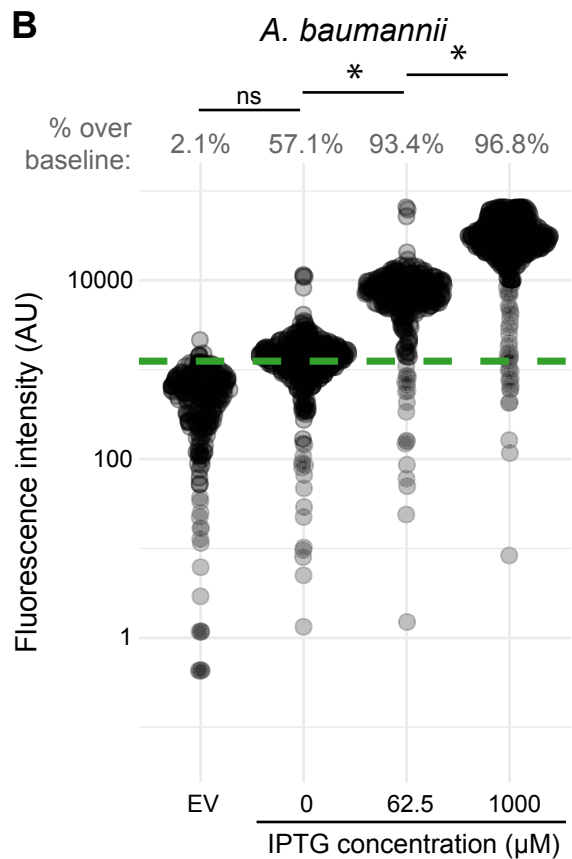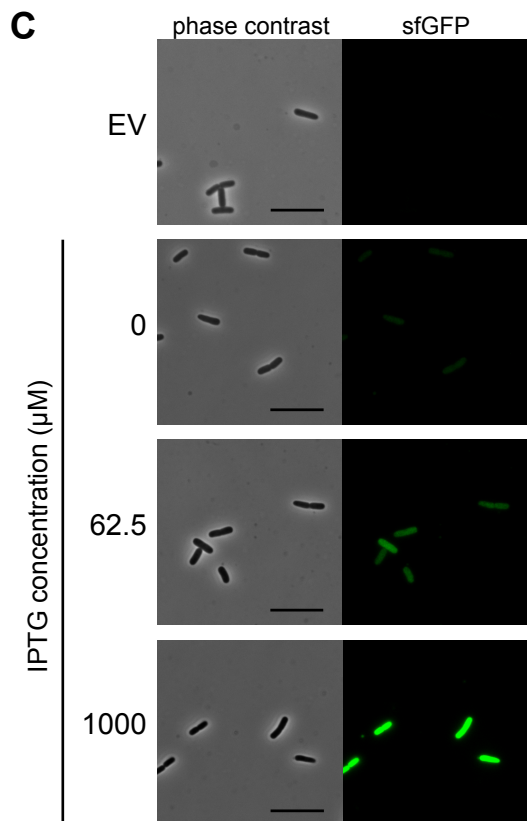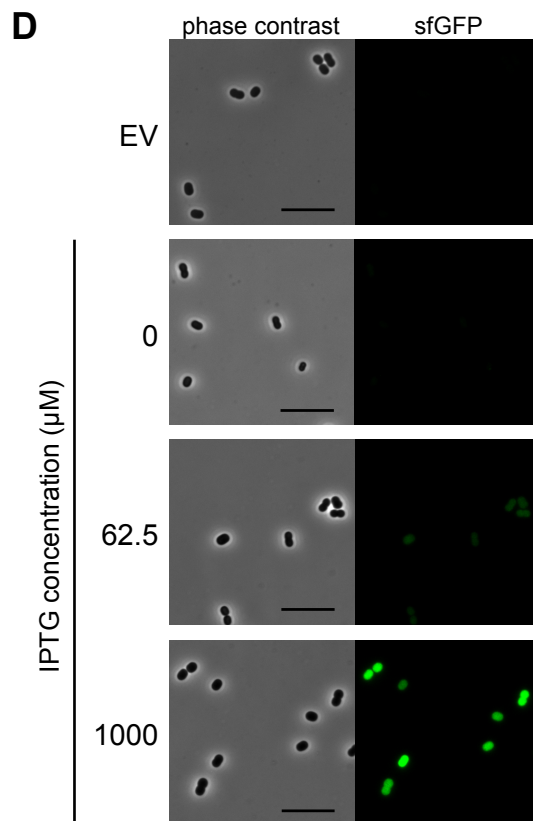

**Figure S4. Single-cell  $P_{\text{abstBR}}$  expression via microscopy.**

Quantification of single-cell sfGFP fluorescence from microscopy images of **(A)** *E. coli* BW25113 or **(B)** *A. baumannii* ATCC 17978. sfGFP was expressed from the replicative vector under control of  $P_{\text{abstBR}}$ . Points represent average fluorescence intensity across cell area for individual cells (n=200-250 for *E. coli*; n=250-450 for *A. baumannii*) induced at 0, 62.5, or 1000  $\mu\text{M}$  IPTG. EV are empty vector (no GFP) control samples in 1 mM IPTG. Green dotted line represents a baseline for fluorescence (empty vector mean + 1.96\*standard deviation). Percent of sample measurements above baseline are reported. Asterisks and ns indicate significant and not significant sample differences, respectively (Welch's *t*-tests; *p*-values < 0.05). Representative images for **(C)** *E. coli* and **(D)** *A. baumannii* samples are shown. Ruler is 10 microns.

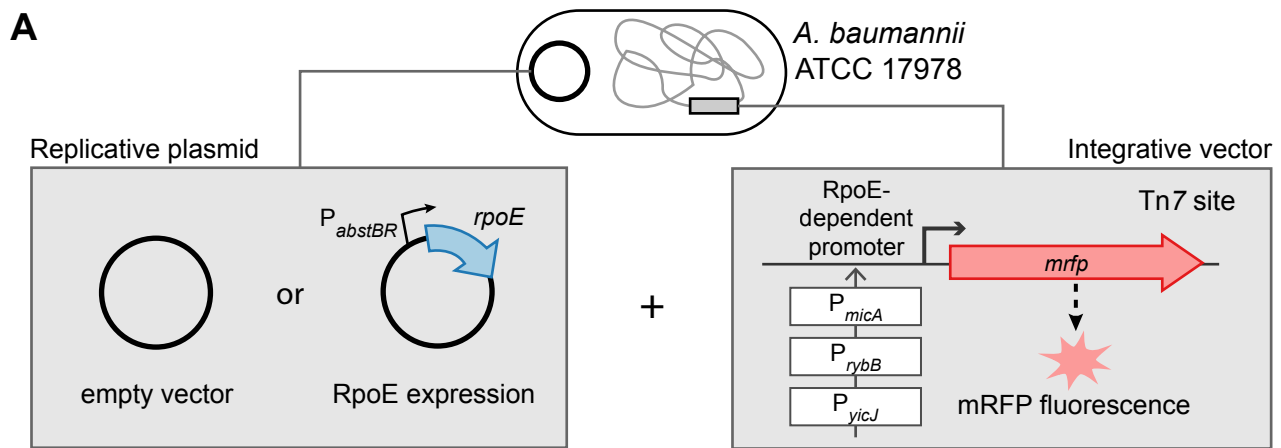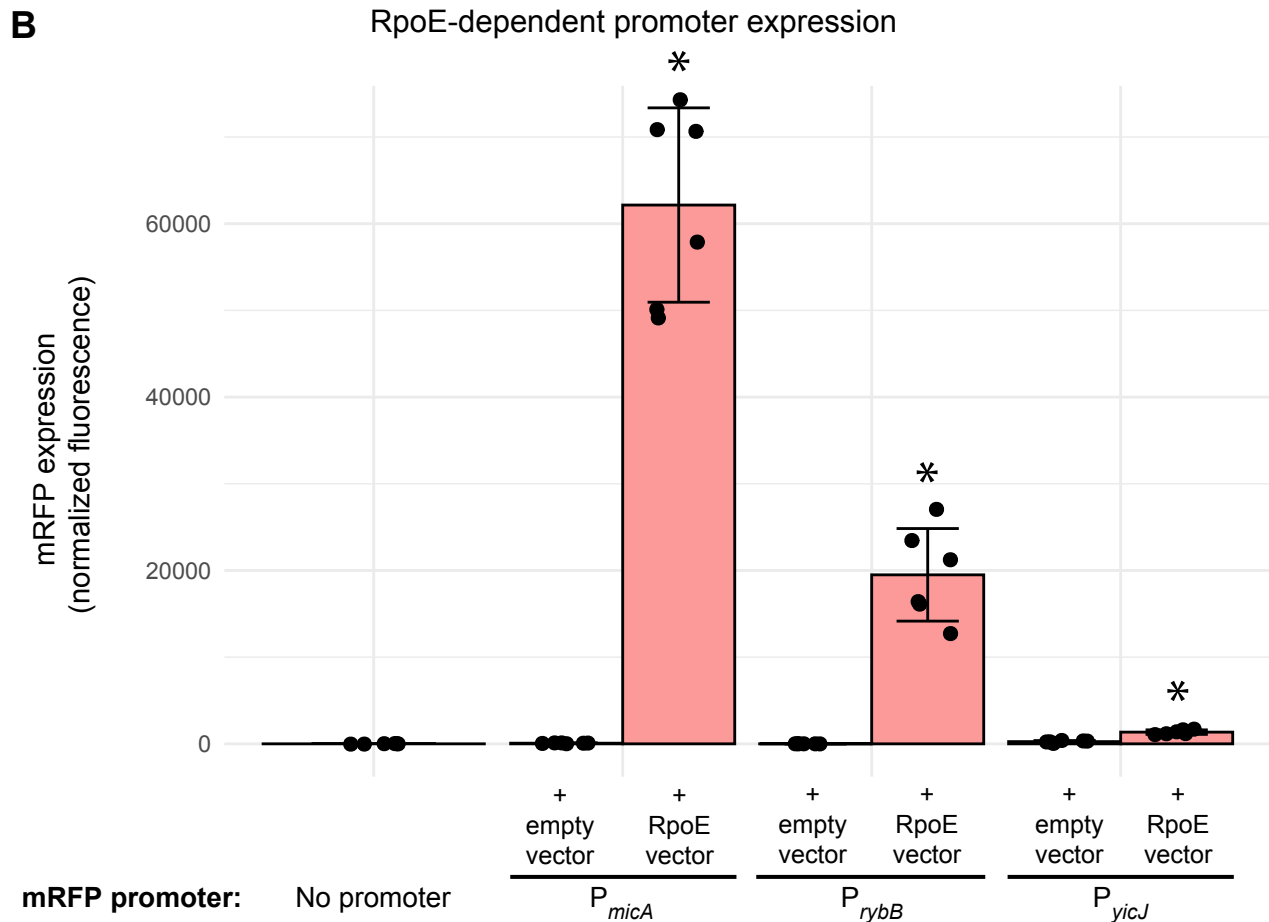

**Figure S5. RpoE-dependent promoter expression in *A. baumannii*.**

**(A)** Graphical depiction of reporter assay experiments. Strains contain a replicative plasmid ( $P_{abstBR}$ - $rpoE$  overexpression vector or empty vector control) and an mRFP reporter under control of the *E. coli*-native and known RpoE-dependent  $micA$ ,  $rybB$ , or  $yicJ$  promoters in the  $att_{Tn7}$  site (constructed using the Tn7 integrative vector). **(B)** Bar graphs of mRFP fluorescence from promoters with and without expression of RpoE *in trans* from the replicative plasmid. Fluorescence is normalized to no promoter control, and individual data points and standard deviation are displayed (n=6 biological replicates). Asterisks indicate significant differences with RpoE expression *in trans* (Welch's *t*-tests; *p*-values < 0.05).
